# Supplementary material for: Distance-dependent hydrophobic–hydrophobic contacts in protein folding simulations
Source: Royal Society of Chemistry journal article supplement (doi:10.1039/c4cp01131g), 2014-01-01
Supplement: c4cp01131g1.pdf [file c4cp01131g1.pdf]

## Supporting Information

### Title:

Distance-depending hydrophobic-hydrophobic contacts in protein folding simulations

### Authors:

Angelo Onofrio<sup>1§</sup>, Giovanni Parisi<sup>1§</sup>, Giuseppe Punzi<sup>1§</sup>, Simona Todisco<sup>1</sup>, Maria Antonietta Di Noia<sup>2</sup>, Fabrizio Bossis<sup>1</sup>, Antonio Turi<sup>1</sup>, Anna De Grassi<sup>1\*\*#</sup>, Ciro Leonardo Pierri<sup>1\*#</sup>

### Author affiliations and contributions:

<sup>1</sup>Department of Biosciences, Biotechnologies and Biopharmaceutics, University of Bari, Via Orabona 4, 70125, Bari, Italy.

<sup>2</sup>Department of Sciences, University of Basilicata, via N. Sauro 85, 85100 Potenza, Italy.

§ Equal contribution

# Joint senior authors

### Corresponding author information:

\* Ciro Leonardo Pierri

Department of Biosciences, Biotechnologies and Biopharmaceutics

University of Bari

Via Orabona 4, 70125, Bari, Italy

tel: +39-0805442772

fax: +39-0805442770

email: [ciroleopierri@gmail.com](mailto:ciroleopierri@gmail.com); [ciro.pierri@uniba.it](mailto:ciro.pierri@uniba.it)

### Corresponding author information:

\*\* Anna De Grassi

Department of Biosciences, Biotechnologies and Biopharmaceutics

University of Bari

Via Orabona 4, 70125, Bari, Italy

tel: +39-0805443614

fax: +39-0805442770

email: [anna.degrassi@uniba.it](mailto:anna.degrassi@uniba.it)

**Keywords:** secondary structure elements and small contact regions; no reverse self avoiding walk; alpha-helix, beta-sheet; hydrophobic driving force; very short-range interactions, short-range interactions, medium-range interactions, long-range interactions; lattices for protein folding

**Abbreviations:** bcc, body center cubic ; fcc, face center cubic; HH, hydrophobic-hydrophobic; PP, polar-polar; HP, hydrophobic-polar

### **Calculation of distances between C $\alpha$ s**

The number and value of the distance between the above cited C $\alpha$ s were calculated by using custom perl scripts and were graphically represented by using R (<http://www.r-project.org/>) scripts. The distance between C $\alpha$ s was manually measured for some small proteins and large protein fragments for validating our scripts by using the distance wizard implemented in the protein visualizer PyMol (<http://www.pymol.org/>). Notably, R was also used to perform Kolmogorov-Smirnov tests between the distributions of distances and to calculate and test the Pearson correlation coefficient (cor) between distances in “true” models and distances of the same contacts in each lattice.

**Table S1** Code for the conversion of the analyzed structures in HP models. 0 indicates polar (P) residues, 1 indicates hydrophobic (H) residues based on the Kyte-Doolittle hydrophobicity scale.

|     |   |
|-----|---|
| ASP | 0 |
| GLU | 0 |
| ALA | 1 |
| ARG | 0 |
| ASN | 0 |
| CYS | 1 |
| PHE | 1 |
| GLY | 1 |
| GLN | 0 |
| ILE | 1 |
| HIS | 0 |
| LEU | 1 |
| LYS | 0 |
| MET | 1 |
| PRO | 0 |
| SER | 0 |
| TYR | 0 |
| THR | 0 |
| TRP | 0 |
| VAL | 1 |

**Table S2** Number of HH and PP contacts and HH/PP ratio for each analyzed protein sequence.

| mainly alpha helix structures | Number of residues | Resolution (Å) | HH contacts | PP contacts | HH / PP ratio | mainly beta sheet structures | Number of residues | Resolution (Å) | HH contacts | PP contacts | HH / PP contacts | Mixed conf. str. | Number of residues | Resolution (Å) | HH contacts | PP contacts | HH / PP contacts |
|-------------------------------|--------------------|----------------|-------------|-------------|---------------|------------------------------|--------------------|----------------|-------------|-------------|------------------|------------------|--------------------|----------------|-------------|-------------|------------------|
| 9ica                          | 327                | 3,00           | 8204        | 19383       | 0,423257      | 1btg                         | 326                | 2,5            | 973         | 1918        | 0,5072           | 1ngf             | 382                | 2,17           | 14971       | 21415       | 0,699089         |
| 1w7b                          | 327                | 1,52           | 7952        | 18223       | 0,436372      | 2af5                         | 282                | 2,5            | 4539        | 17095       | 0,2655           | 1iep             | 274                | 2,10           | 6733        | 12153       | 0,55402          |
| 1avr                          | 319                | 2,30           | 9668        | 15303       | 0,631772      | 3hb3-chainC                  | 118                | 2,25           | 934         | 2660        | 0,3511           | 1i9b             | 205                | 2,70           | 2535        | 8695        | 0,291547         |
| 1okc                          | 292                | 2,20           | 12313       | 8845        | 1,392086      | 1pdg                         | 87                 | 3              | 726         | 1104        | 0,6576           | 1no5             | 202                | 1,80           | 3451        | 6835        | 0,504901         |
| 1vin                          | 252                | 2,20           | 6057        | 9792        | 0,618566      | 1hae                         | 63                 | 1,14           | 340         | 611         | 0,5564           | 2bh8             | 171                | 1,90           | 3961        | 3128        | 1,266304         |
| 1ad6                          | 185                | 2,30           | 3449        | 4995        | 0,69049       | 1pi2                         | 61                 | 2,5            | 223         | 717         | 0,3110           | 2abl             | 163                | 2,50           | 1811        | 5091        | 0,355726         |
| 1pbw                          | 184                | 2,00           | 3126        | 5298        | 0,590034      | 1zad                         | 60                 | 0,2485         | 393         | 450         | 0,8733           | 1m2e             | 135                | 0,78           | 2242        | 2175        | 1,030805         |
| 2blh                          | 153                | 1,77           | 2388        | 3362        | 0,710291      | 1ju5-sh2                     | 60                 | 1,29           | 268         | 611         | 0,4386           | 1o8v             | 132                | 1,60           | 1515        | 2804        | 0,5403           |
| 1elk                          | 153                | 1,50           | 2314        | 3439        | 0,67287       | 1egf                         | 53                 | 2,5            | 201         | 477         | 0,4213           | 1ju5-sh3         | 109                | 1,21           | 726         | 2370        | 0,306329         |
| 1a00                          | 136                | 2,00           | 2321        | 2528        | 0,918117      | 1k36                         | 46                 | 1,51           | 246         | 245         | 1,0040           | 1o13             | 105                | 1,83           | 1457        | 1202        | 1,212146         |
| 1d9s                          | 67                 | 1,244          | 2665        | 1867        | 1,427424      | 1a3p                         | 43                 | 1,14           | 146         | 287         | 0,5087           | 1h7m             | 97                 | 1,96           | 1153        | 1060        | 1,087736         |
| 1rg6                          | 64                 | 1,39           | 395         | 683         | 0,578331      | 1edm                         | 39                 | 1,5            | 132         | 221         | 0,5972           | 1koy             | 62                 | 1,49           | 265         | 679         | 0,39028          |
| 1dxs                          | 57                 | 2,54           | 340         | 421         | 0,807601      | 2gwp                         | 32                 | 1,54           | 129         | 100         | 1,29             | 1dgz             | 37                 | 1,07           | 101         | 219         | 0,461187         |
| 7ins                          | 30                 | 2,00           | 126         | 71          | 1,774648      | 1zr7                         | 30                 | 0.90           | 1           | 352         | 0,0028           | 1c6w             | 33                 | 1,4            | 63          | 198         | 0,318182         |
| total                         |                    |                | 61318       | 94210       |               |                              |                    |                | 9251        | 26848       |                  |                  |                    |                | 40984       | 68024       |                  |
| <b>Tot HH/PP ratio</b>        |                    |                |             |             | 0,650865      |                              |                    |                |             |             | 0,35042          |                  |                    |                |             |             | 0,602493         |

**Table S3a.** RMSD calculated between C $\alpha$ s from “true” and “lattice” models. Helices PDB accession numbers are reported for each analyzed crystal structure (from Pierri et al., Proteins 2008). For each protein HH contacts, PP contacts and HH/PP ratio are again reported.

| mainly helices-ID | cubic_00    | tetra_01   | d_tet_02    | quadr_03    | cub2u_04     | fcc_05       | bcc_06      | HH contacts | PP contacts | HH / PP ratio |
|-------------------|-------------|------------|-------------|-------------|--------------|--------------|-------------|-------------|-------------|---------------|
| 9ica              | 4,28        | 2,74       | 2,18        | 4,01        | 3,32         | 3,26         | 2,36        | 8204        | 19383       | 0,423257      |
| 1w7b              | 3,5         | 2,78       | 2,46        | 3,12        | 3,44         | 2,74         | 2,24        | 7952        | 18223       | 0,436372      |
| 1avr              | 3,79        | 2,88       | 2,52        | 3,34        | 3,36         | 2,95         | 2,45        | 9668        | 15303       | 0,631772      |
| 1okc              | 3,16        | 2,48       | 2,1         | 2,9         | 2,93         | 2,3          | 1,91        | 12313       | 8845        | 1,392086      |
| 1vin              | 3,52        | 2,72       | 1,99        | 3,15        | 2,96         | 2,56         | 2,03        | 6057        | 9792        | 0,618566      |
| 1ad6              | 3,13        | 2,78       | 1,99        | 2,97        | 3,39         | 2,44         | 1,88        | 3449        | 4995        | 0,69049       |
| 1pbw              | 2,96        | 2,68       | 2,23        | 3           | 3,01         | 2,28         | 2           | 3126        | 5298        | 0,590034      |
| 2blh              | 3,58        | 2,76       | 2,12        | 3,1         | 3,15         | 2,34         | 1,87        | 2388        | 3362        | 0,710291      |
| 1elk              | 3,19        | 2,63       | 2,24        | 3,08        | 3            | 2,62         | 2,03        | 2314        | 3439        | 0,67287       |
| 1a00              | 3,29        | 2,42       | 1,95        | 2,7         | 3,17         | 2,36         | 1,78        | 2321        | 2528        | 0,918117      |
| 1d9s              | 3,8         | 2,8        | 2,3         | 2,97        | 3,03         | 2,97         | 2,31        | 2665        | 1867        | 1,427424      |
| 1rg6              | 2,99        | 2,46       | 1,92        | 2,97        | 3,04         | 2,47         | 2,09        | 395         | 683         | 0,578331      |
| 1dxs              | 2,9         | 2,34       | 2,04        | 2,88        | 2,93         | 2,4          | 1,93        | 340         | 421         | 0,807601      |
| 7ins              | 3,37        | 2,22       | 2,05        | 3,3         | 2,6          | 3,39         | 2,59        | 126         | 71          | 1,774648      |
| <b>MEDIAN</b>     | <b>3,33</b> | <b>2,7</b> | <b>2,11</b> | <b>3,04</b> | <b>3,035</b> | <b>2,515</b> | <b>2,03</b> |             |             |               |

**Table S3b.** RMSD calculated between C $\alpha$ s from “true” and “lattice” models. Mixed conformations PDB accession numbers are reported for each analyzed crystal structure (from Pierri et al., Proteins 2008). For each protein HH contacts, PP contacts and HH/PP ratio are again reported.

| <b>mixed conformation</b> | <b>cubic_00</b> | <b>tetra_01</b> | <b>d_tet_02</b> | <b>quadr_03</b> | <b>cub2u_04</b> | <b>fcc_05</b> | <b>bcc_06</b> | <b>HH contacts</b> | <b>PP contacts</b> | <b>HH / PP ratio</b> |
|---------------------------|-----------------|-----------------|-----------------|-----------------|-----------------|---------------|---------------|--------------------|--------------------|----------------------|
| 1ngf                      | 3,95            | 2,89            | 2,23            | 3,75            | 3,17            | 3,51          | 2,42          | 14971              | 21415              | 0,699089             |
| 1iep                      | 3,52            | 2,83            | 2,15            | 3,31            | 3,18            | 2,92          | 2,3           | 6733               | 12153              | 0,55402              |
| 1i9b                      | 4,92            | 3,15            | 2,64            | 4,12            | 3,69            | 4,76          | 3,25          | 2535               | 8695               | 0,291547             |
| 1no5                      | 3,87            | 2,92            | 2,17            | 3,35            | 3,12            | 3,29          | 2,52          | 3451               | 6835               | 0,504901             |
| 2bh8                      | 4,91            | 3,54            | 2,93            | 4,54            | 3,66            | 4,65          | 3,55          | 3961               | 3128               | 1,266304             |
| 2abl                      | 3,77            | 2,59            | 1,99            | 3,06            | 2,93            | 2,97          | 2,15          | 1811               | 5091               | 0,355726             |
| 1m2e                      | 4,02            | 2,45            | 2,04            | 3,6             | 3,14            | 3,14          | 2,25          | 2242               | 2175               | 1,030805             |
| 1o8v                      | 4,6             | 2,96            | 2,24            | 3,89            | 3,29            | 3,71          | 2,99          | 1515               | 2804               | 0,5403               |
| 1ju5sh3                   | 4,09            | 2,7             | 2,25            | 3,35            | 3,01            | 3,47          | 2,56          | 726                | 2370               | 0,306329             |
| 1o13                      | 4,36            | 2,59            | 2,08            | 4,23            | 3,02            | 3             | 2,14          | 1457               | 1202               | 1,212146             |
| 1h7m                      | 3,14            | 2,62            | 1,98            | 2,97            | 2,82            | 3,07          | 2,44          | 1153               | 1060               | 1,087736             |
| 1koy                      | 3,79            | 2,35            | 3,09            | 2,03            | 2,93            | 2,09          | 1,78          | 265                | 679                | 0,39028              |
| 1dgz                      | 3,19            | 2,68            | 1,95            | 2,94            | 2,96            | 2,81          | 2,11          | 101                | 219                | 0,461187             |
| 1c6w                      | 3,18            | 2,63            | 2,21            | 3,24            | 3,28            | 2,88          | 2,18          | 63                 | 198                | 0,318182             |
| <b>MEDIAN</b>             | <b>3,91</b>     | <b>2,69</b>     | <b>2,19</b>     | <b>3,35</b>     | <b>3,13</b>     | <b>3,105</b>  | <b>2,36</b>   |                    |                    |                      |

**Table S3c.** RMSD calculated between C $\alpha$ s from “true” and “lattice” models. Beta-sheet PDB accession numbers are reported for each analyzed crystal structure (from Pierri et al., Proteins 2008). For each protein HH contacts, PP contacts and HH/PP ratio are again reported.

| mainly sheets-ID | cubic_00     | tetra_01    | d_tet_02     | quadr_03     | cub2u_04    | fcc_05       | bcc_06       | HH contacts | PP contacts | HH / PP ratio |
|------------------|--------------|-------------|--------------|--------------|-------------|--------------|--------------|-------------|-------------|---------------|
| 1btg             | 7,71         | 3,94        | 3,96         | 4,99         | 4,45        | 4,96         | 4,3          | 973         | 1918        | 0,507299      |
| 2af5             | 4,98         | 3,43        | 2,31         | 4,48         | 3,61        | 4,31         | 2,92         | 4539        | 17095       | 0,265516      |
| 1pdg             | 6            | 3,52        | 3,24         | 4,57         | 4,21        | 5,8          | 4,29         | 726         | 1104        | 0,657609      |
| 1hae             | 3,66         | 2,48        | 2,29         | 3,04         | 3,12        | 2,77         | 2,76         | 340         | 611         | 0,556465      |
| 1ju5Sh2          | 2,8          | 1,99        | 1,83         | 6,09         | 3,12        | 2,01         | 2,25         | 393         | 450         | 0,873333      |
| 1zad             | 3,97         | 2,86        | 2,54         | 3,77         | 3,53        | 3,47         | 2,39         | 268         | 611         | 0,438625      |
| 1egf             | 4,4          | 2,59        | 2,52         | 4,04         | 3,27        | 3,23         | 2,54         | 201         | 477         | 0,421384      |
| 1epg             | 3,24         | 2,64        | 2,07         | 3,03         | 2,86        | 2,34         | 2,67         | 201         | 477         | 0,421384      |
| 3egf             | 3,29         | 2,79        | 2,49         | 3,36         | 3,03        | 3,23         | 2,36         | 201         | 477         | 0,421384      |
| 1k36             | 3,54         | 2,25        | 2,01         | 5,35         | 2,68        | 3,26         | 2,84         | 246         | 245         | 1,004082      |
| 1a3p             | 5,77         | 2,16        | 2,02         | 3,03         | 3,06        | 3,03         | 2,42         | 146         | 287         | 0,508711      |
| 1edm             | 3,58         | 3,24        | 2,83         | 3,49         | 3,5         | 3,29         | 3,23         | 132         | 221         | 0,597285      |
| 2gwp             | 5,5          | 2,55        | 2,59         | 5,47         | 3,56        | 3,44         | 2,74         | 129         | 100         | 1,29          |
| 1zr7             | 2,82         | 2,66        | 2,85         | 2,73         | -           | 2,27         | 1,9          | 1           | 352         | 0,002841      |
| <b>MEDIAN</b>    | <b>3,815</b> | <b>2,65</b> | <b>2,505</b> | <b>3,905</b> | <b>3,27</b> | <b>3,245</b> | <b>2,705</b> |             |             |               |



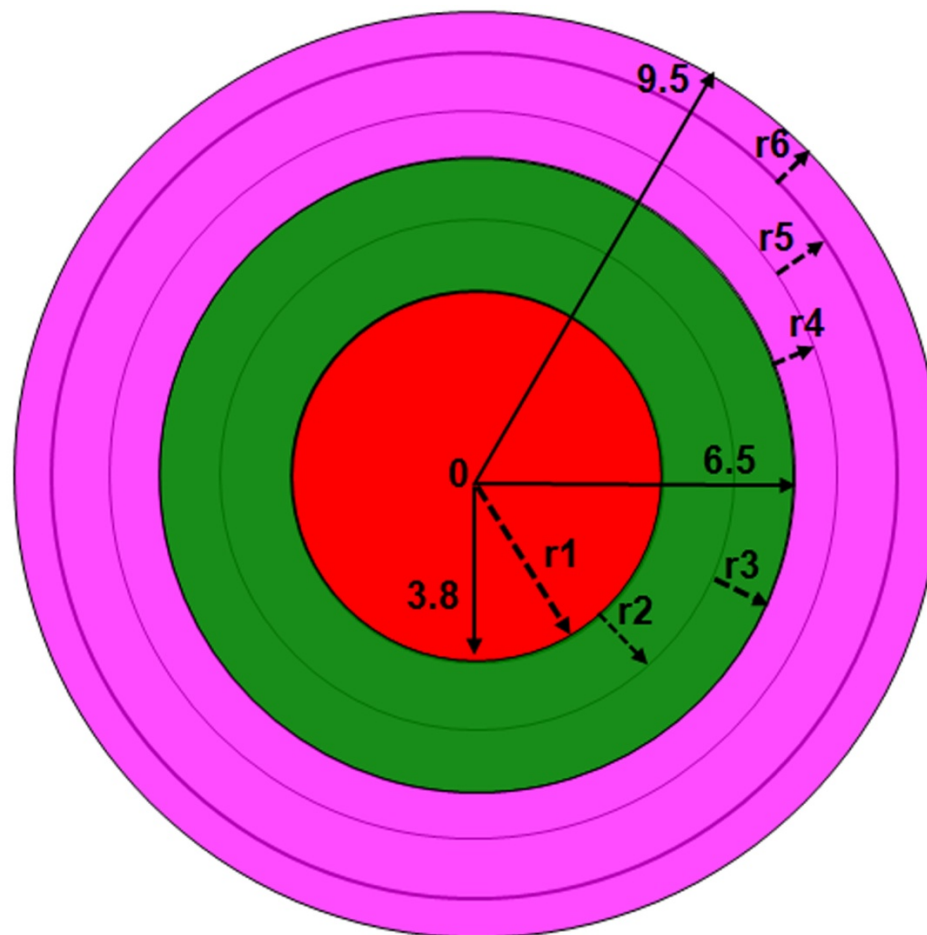

**Figure S1.** Schematic circular representation of the analyzed distance ranges. The three differently colored surfaces indicate the ranges of very short- (red), short- (green) and medium-range (purple) interactions, which are further classified into six sub-ranges (r1-r6, dashed arrows). Distances from the central C $\alpha$  are indicated by solid arrows.

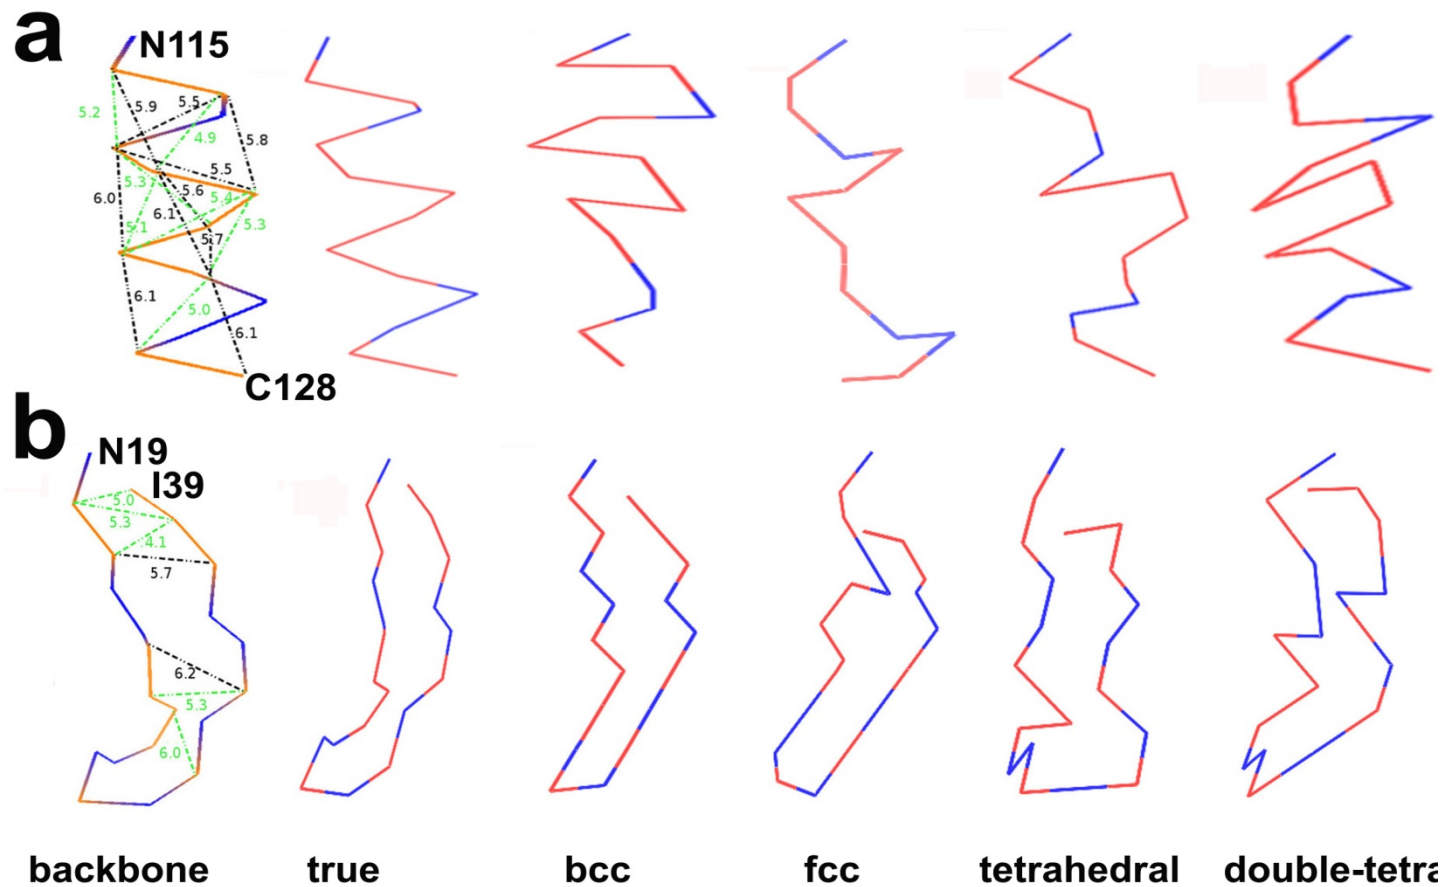

**Figure S2. Fitting examples of intra-secondary structure interactions to lattices.** a) All helix “1okc”: ribbon representation for the protein fragment 115-NLASGGAAGATSL-127. b) All sheet “1zad” : ribbon representation for the protein fragment 19-NLCYKMFMSDLTIPVKGCI-39. Lattice models “true”; body center cubic, “bcc”; face center cubic “fcc”, tetrahedral, double-tetrahedral, “double-tetra” are also reported as indicated on the bottom of the figures for both “1okc” and “1zad”. All atom structures are reported in orange - blue ribbon representation (orange for hydrophobic and blue for polar residues) and side-chains are hidden. Lattice HP models are reported by ribbon representation, hydrophobic residues are reported in red, polar residues are reported in blue according to Kyte-Doolittle hydrophobicity scale. Green dashed lines highlight HH contacts in 5.4 Å distance range, black dashed lines highlight HH contacts in the 5.5 - 6.5 Å distance range.

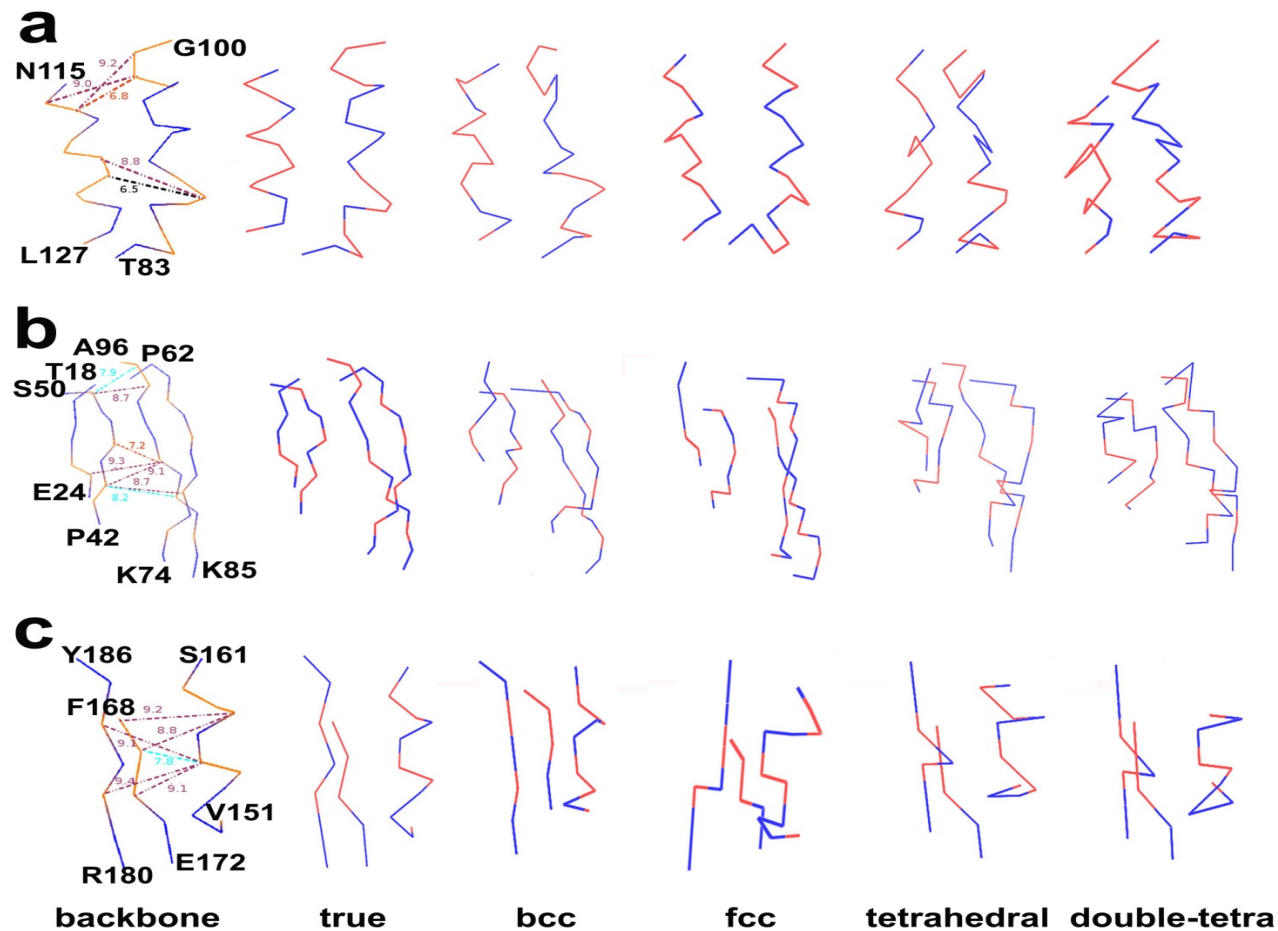

**Figure S3. Fitting examples of inter-secondary structure interactions to lattices.** a) All helix “1okc”: ribbon representation for the protein fragments 83-TQALNFAFKDKYKQIFLG-100 and 115-NLASGGAAGATSL-127. b) All sheet “1pdg”: ribbon representation for the protein fragments 18-TRTEVFE-24/42-PCVEVQRCS-50/62-PTQVQLRPVQVRK-74/85-KKATVTLEDHLA-96. c) Mixed conformation “2abl”: 151-VSRNAAEYLLS-161/168-FLVRE-172/180-RSISLRY-186. Lattice models “true”; body center cubic, “bcc”; face center cubic “fcc”, tetrahedral, double-tetrahedral, “double-tetra” are also reported as indicated on the bottom of the figures for both “1okc” and “1pdg” and “2abl”.

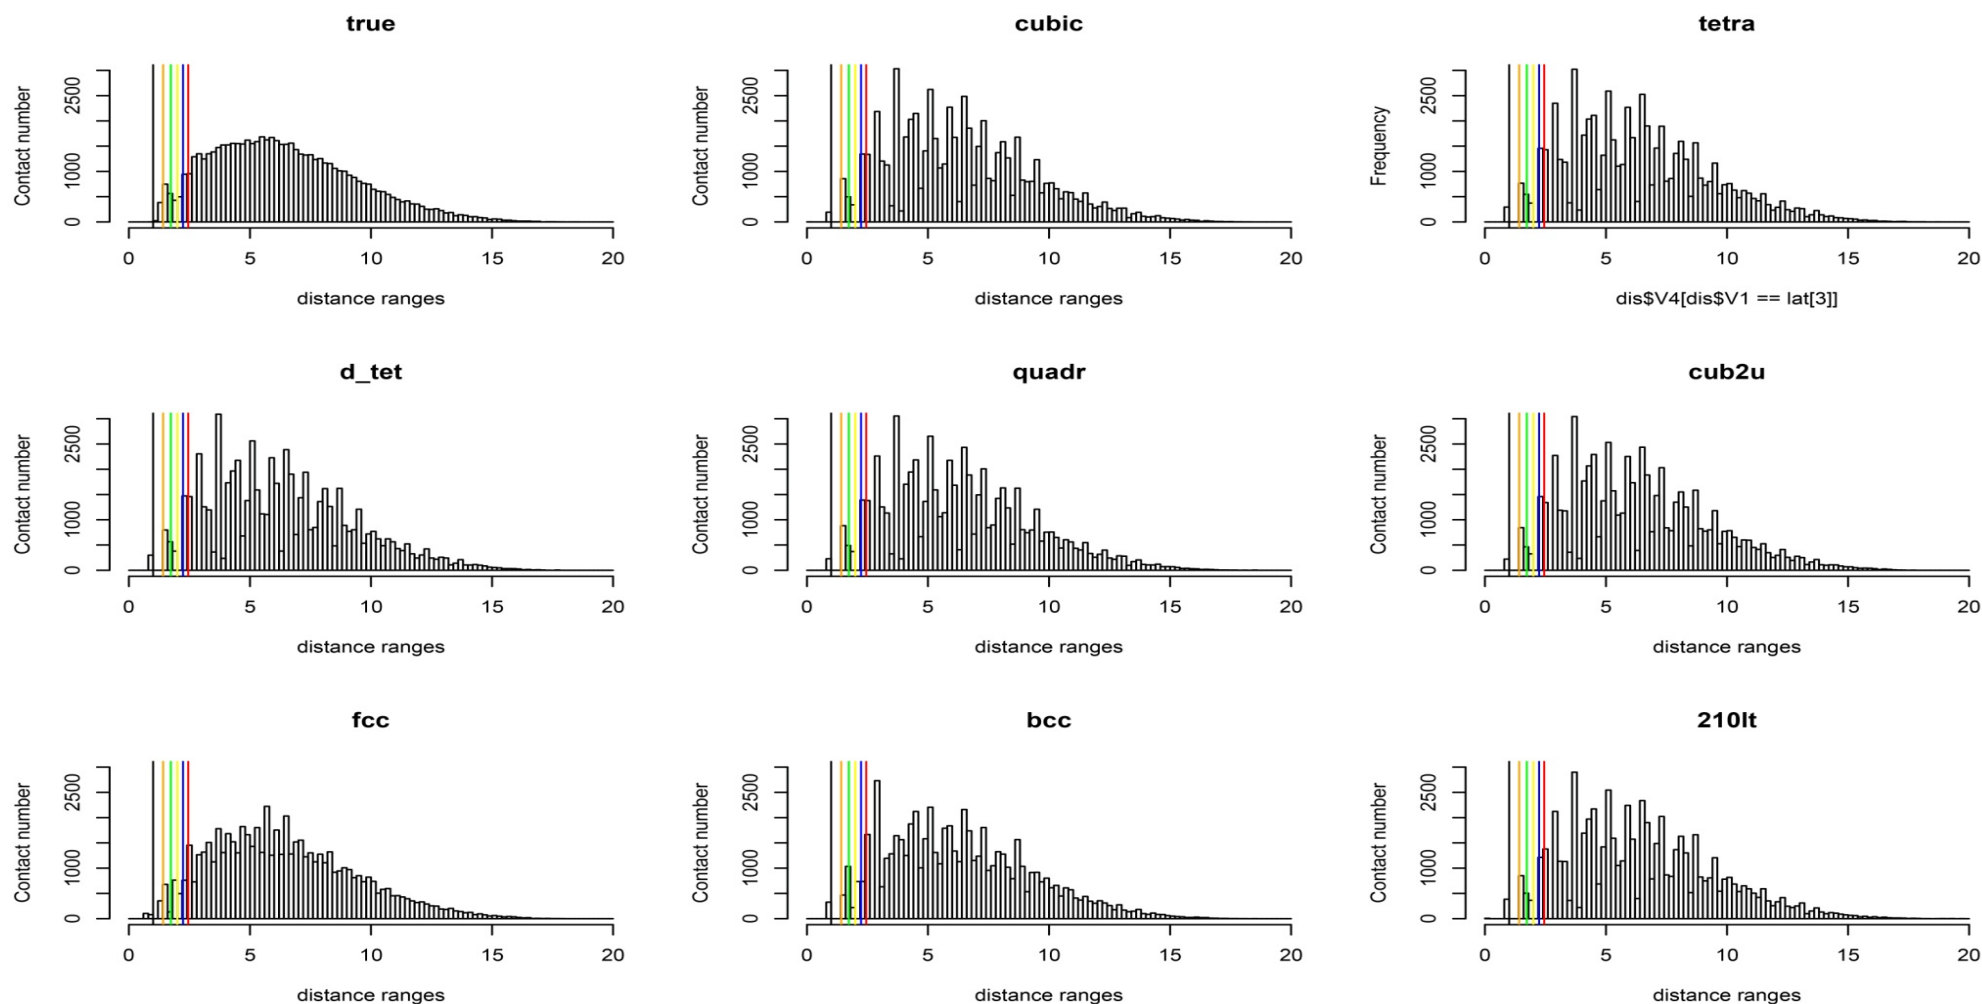

**Figure S4.** Distribution of all the HH contacts computable in the “true” models and in all the analyzed lattice HP models generated from mainly helix structures. The number of HH contacts counted through all true/lattice structures is reported on Y axis (contact number) for each of the represented bins covering the full range of measurable distances (reported on X axis as multiple of 3.8, i.e. from  $0 \times 3.8$  to  $20 \times 3.8$  Å) within the analyzed structures. Each bin covers a specific range of distances. Vertical colored lines indicate the extremities of distance range interactions containing very short- (r1, black line), short- (r2, r3, orange and green, respectively) and medium- (r4, r5, r6, yellow, blue and red, respectively) interactions.

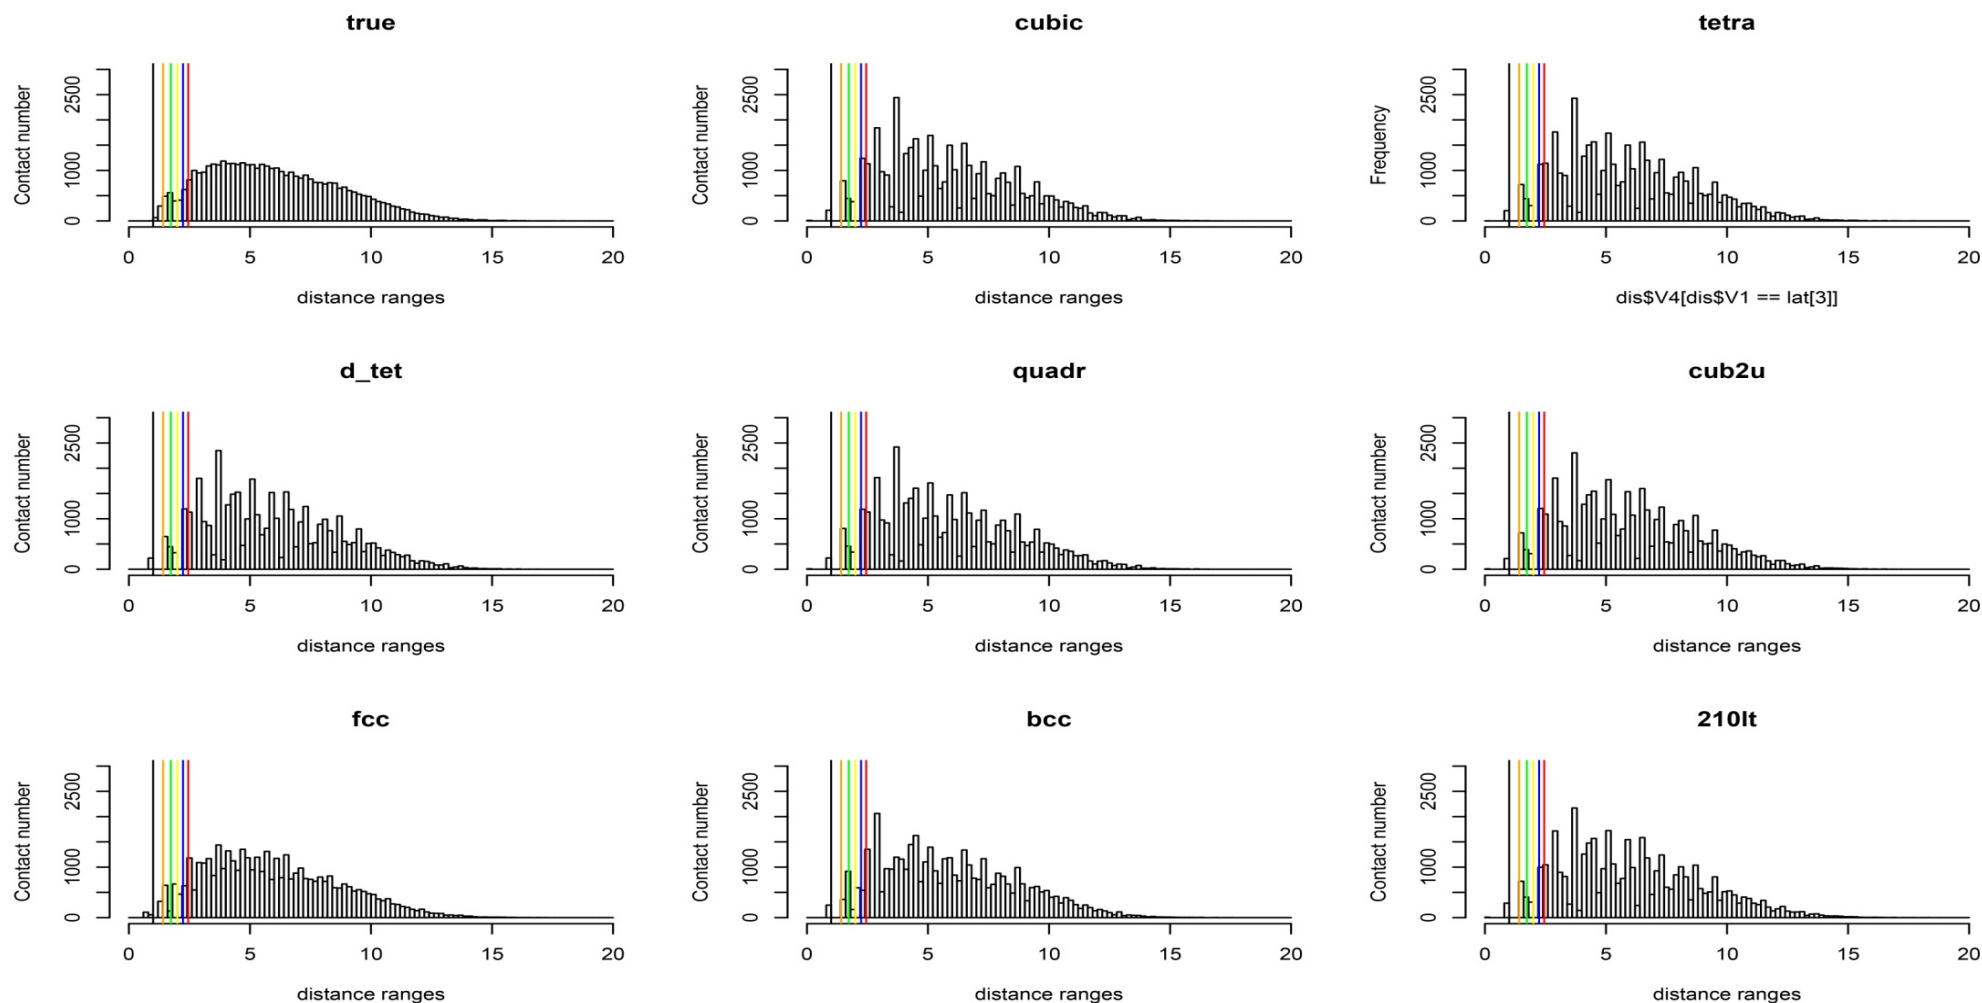

**Figure S5.** Distribution of all the HH contacts computable in the “true” models and in all the analyzed lattice HP models generated from mixed conformation structures. The number of HH contacts counted through all true/lattice structures is reported on Y axis (contact number) for each of the represented bins covering the full range of measurable distances (reported on X axis as multiple of 3.8, i.e. from 0 x 3.8 to 20 x 3.8 Å) within the analyzed structures. Each bin covers a specific range of distances. Vertical colored lines indicate the extremities of distance range interactions containing very short- (r1, black line), short- (r2, r3, orange and green, respectively) and medium- (r4, r5, r6, yellow, blue and red, respectively) interactions.

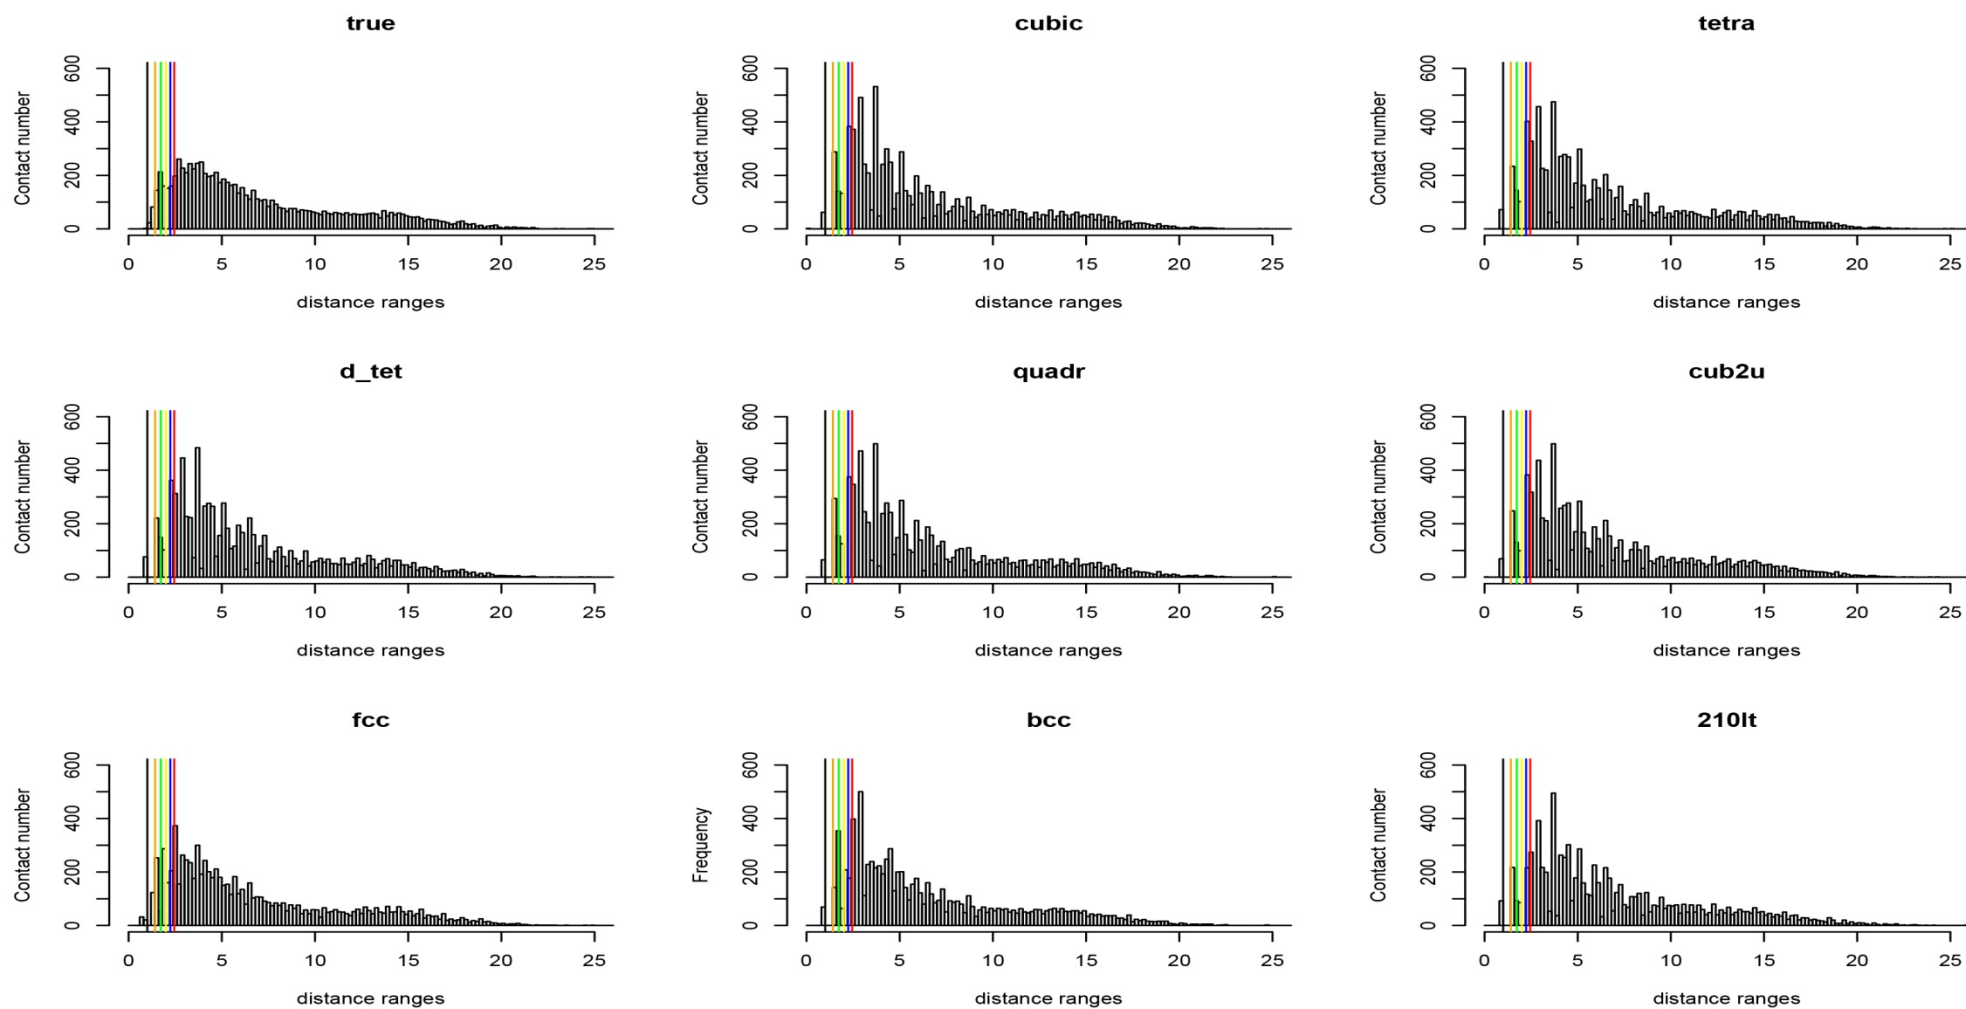

**Figure S6.** Distribution of all the HH contacts computable in the “true” models and in all the analyzed lattice HP models generated from mainly sheet structures. The number of HH contacts counted through all true/lattice structures is reported on Y axis (contact number) for each of the represented bins covering the full range of measurable distances (reported on X axis as multiple of 3.8, i.e. from  $0 \times 3.8$  to  $25 \times 3.8$  Å) within the analyzed structures. Each bin covers a specific range of distances. Vertical colored lines indicate the extremities of distance range interactions containing very short- (r1, black line), short- (r2, r3, orange and green, respectively) and medium- (r4, r5, r6, yellow, blue and red, respectively) interactions.

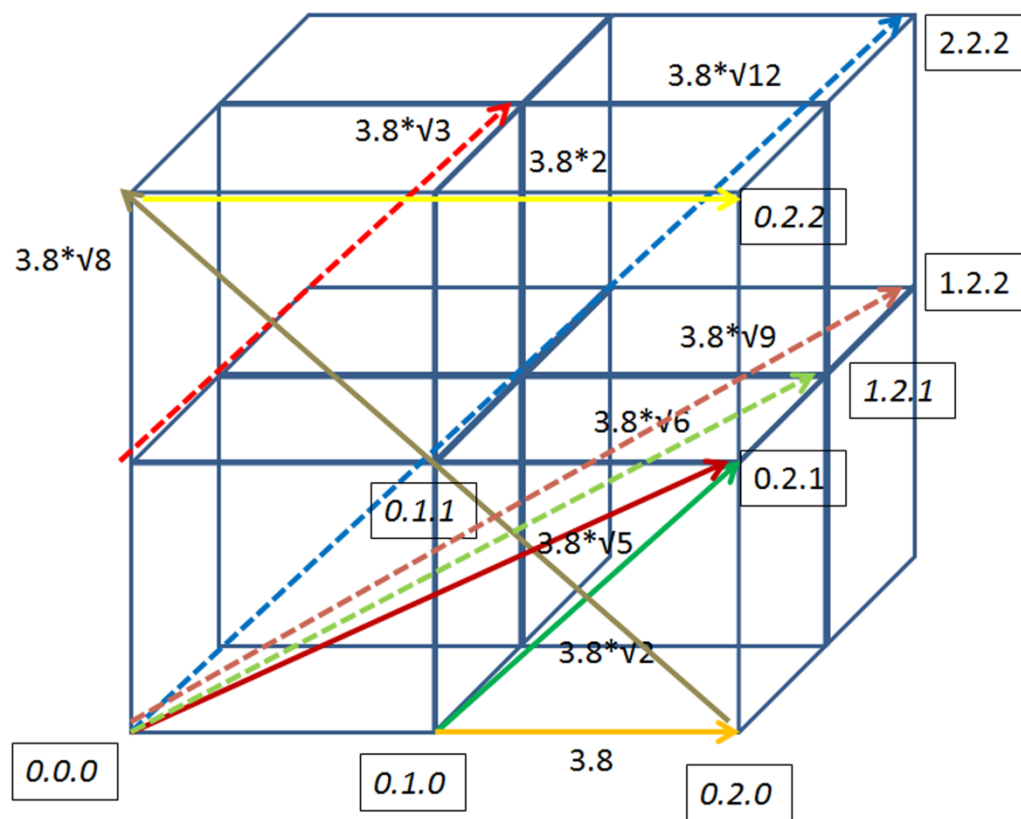

**Figure S7.** Examples of sides, face-diagonals (solid arrows) and depth-diagonals (dashed arrows) among vertices of a cubic lattice that could be occupied by the Cas of a protein. Distances among vertices are indicated as multiple of 3.8 (or the distance between the Cas of two residues connected by the backbone) and by labels. Cartesian coordinates (in units of 3.8 Å) of some vertices are indicated by labels within box.
